# Supplementary material for: Controllable synthesis of iridium(iii)-based aggregation-induced emission and/or piezochromic luminescence phosphors by simply adjusting the substitution on ancillary ligands
Source: Royal Society of Chemistry journal article supplement (doi:10.1039/c2tc00558a), 2012-12-14
Supplement: c2tc00558a.pdf [file c2tc00558a.pdf]

## Electronic Supplementary Information (ESI)

# Controllable synthesis of iridium(III)-based aggregation-induced emission and/or piezochromic luminescence phosphors by simply adjusting the substitutions on ancillary ligands

Guo-Gang Shan, Hai-Bin Li, Hai-Zhu Sun, Dong-Xia Zhu, Hong-Tao Cao and Zhong-Min Su\*

Institute of Functional Material Chemistry, faculty of chemistry, Northeast Normal University  
Jilin 130024, People's Republic of China.

E-mail: zmsu@nenu.edu.cn

### Table of Contents

|                               |     |
|-------------------------------|-----|
| 1. Calculation data           | 2–3 |
| 2. X-ray crystallography data | 3–4 |
| 3 Photophysical properties    | 5–9 |
| 4. Reference                  | 9   |

## 1. Theoretical calculations

Calculation on the ground and excited electronic state of complexes were investigated by performing DFT and TD-DFT at B3LYP level. The 6-31G\* basis sets were employed for optimizing the C, H, N atoms and the LANL2DZ basis sets for Ir atom. An effective core potential (ECP) replaces the inner core electrons of iridium leaving the outer core  $(5s)^2(5p)^6$  electrons and the  $(5d)^6$  valence electrons of Ir(III). In order to reduce the computational efforts, the molecular structure of complex **3** was simplified by replacing *tert*-butyl moiety with methyl group. All calculations reported here were carried out with the Gaussian 09 software package.<sup>1</sup>

**Table S1** HOMO and LUMO orbitals of complexes **1**, **2** and **3**

|                  | HOMO                                                                                | LUMO                                                                                 |
|------------------|-------------------------------------------------------------------------------------|--------------------------------------------------------------------------------------|
| complex <b>1</b> | 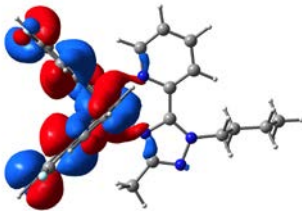  |   |
| complex <b>2</b> |  |  |
| complex <b>3</b> |  |  |

**Table S2** The calculated energy levels of the lower-lying transitions of complexes **1**, **2** and **3**

| Complex  | States         | Assignment | eV   | <i>f</i> | Nature                               |
|----------|----------------|------------|------|----------|--------------------------------------|
| <b>1</b> | T <sub>1</sub> | H→L (97%)  | 2.90 | 0        | <sup>3</sup> MLCT/ <sup>3</sup> LLCT |
| <b>2</b> | T <sub>1</sub> | H→L (100%) | 2.63 | 0        | <sup>3</sup> ILCT                    |
| <b>3</b> | T <sub>1</sub> | H→L (100%) | 2.45 | 0        | <sup>3</sup> ILCT                    |

**Table S3** Crystal data and summary of data collection and refinement for complex **1**.

| <b>1</b>                                                                                                          |                                                                       |
|-------------------------------------------------------------------------------------------------------------------|-----------------------------------------------------------------------|
| Formula                                                                                                           | C <sub>30</sub> H <sub>26</sub> F <sub>10</sub><br>IrN <sub>8</sub> P |
| <i>Mr</i>                                                                                                         | 911.76                                                                |
| Crystal system                                                                                                    | Triclinic                                                             |
| Space group                                                                                                       | P-1                                                                   |
| <i>a</i> / Å                                                                                                      | 9.795(5)                                                              |
| <i>b</i> / Å                                                                                                      | 9.798(5)                                                              |
| <i>c</i> / Å                                                                                                      | 19.810 (5)                                                            |
| $\alpha$ / °                                                                                                      | 95.148(5)                                                             |
| $\beta$ / °                                                                                                       | 97.711(5)                                                             |
| $\gamma$ / °                                                                                                      | 118.407(5)                                                            |
| <i>V</i> / Å <sup>3</sup>                                                                                         | 1631.2(12)                                                            |
| <i>Z</i>                                                                                                          | 2                                                                     |
| $\rho_{\text{calc}}$ (g/cm <sup>3</sup> )                                                                         | 1.856                                                                 |
| temp (K)                                                                                                          | 293(2)                                                                |
| $\mu$ / mm <sup>-1</sup>                                                                                          | 4.235                                                                 |
| <i>R</i> <sub>int</sub>                                                                                           | 0.0282                                                                |
| Goodness-of-fit<br>on <i>F</i> <sup>2</sup>                                                                       | 1.086                                                                 |
| <i>R</i> <sub>1</sub> <sup>a</sup> , <i>wR</i> <sub>2</sub> <sup>b</sup> [ <i>I</i> ><br>2 $\sigma$ ( <i>I</i> )] | 0.0993,<br>0.2611                                                     |
| <i>R</i> <sub>1</sub> , <i>wR</i> <sub>2</sub> (all<br>data)                                                      | 0.1082,<br>0.2662                                                     |

<sup>a</sup>  $R_1 = \frac{\sum ||F_o| - |F_c||}{\sum |F_o|}$ . <sup>b</sup>  $wR_2 = \left\{ \frac{\sum [w(F_o^2 - F_c^2)^2]}{\sum [w(F_o^2)^2]} \right\}^{1/2}$

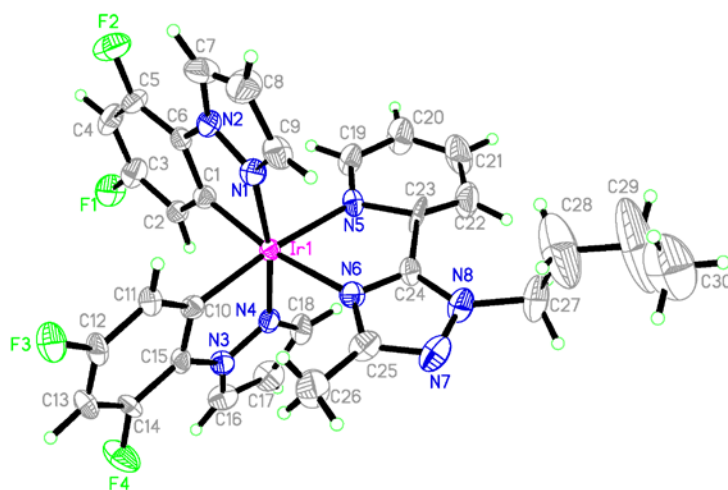

**Fig. S1** Crystal structure of complex **1** with thermal ellipsoids drawn at the 30% probability level. The  $\text{PF}_6^-$  counter anions are omitted for clarity.

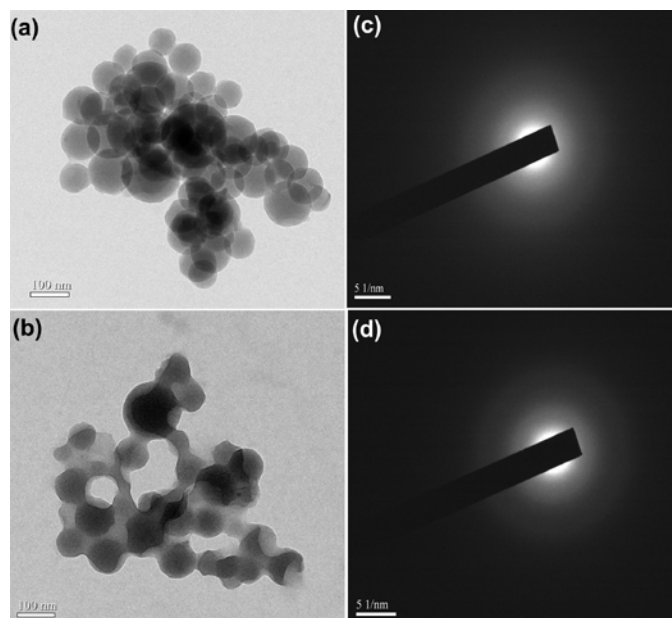

**Fig. S2** TEM images of aggregates of complexes **2**(a) and **3** (b) and ED patterns (**2** for c and **3** for d) formed in water/acetone mixtures with water content of 90%, respectively.

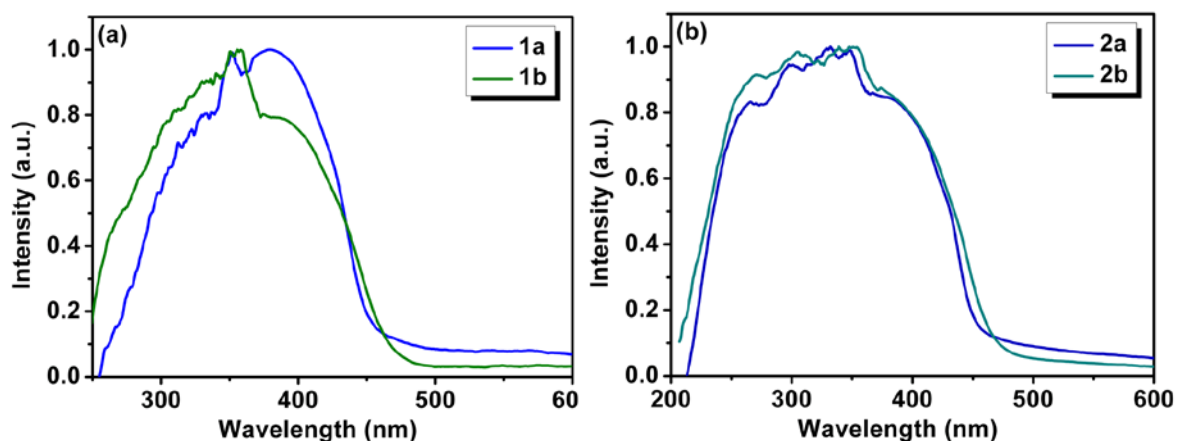

**Fig. S3** Solid-state absorption spectra of complexes **1** and **2** before (**1a** and **2a**) and after (**1b** and **2b**) grinding.

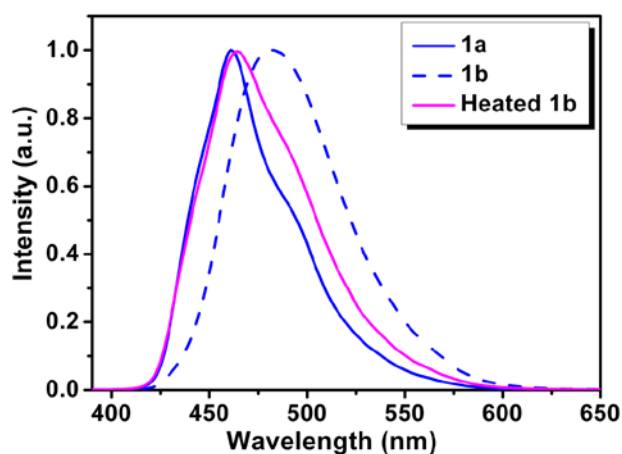

**Fig. S4** Emission spectra of **1** in different states at room temperature.

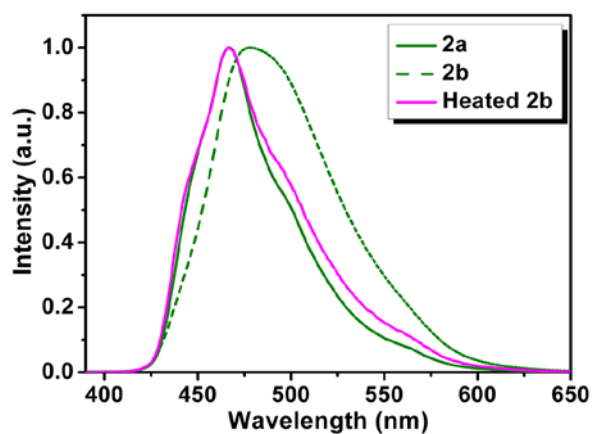

**Fig. S5** Emission spectra of **2** in different states at room temperature.

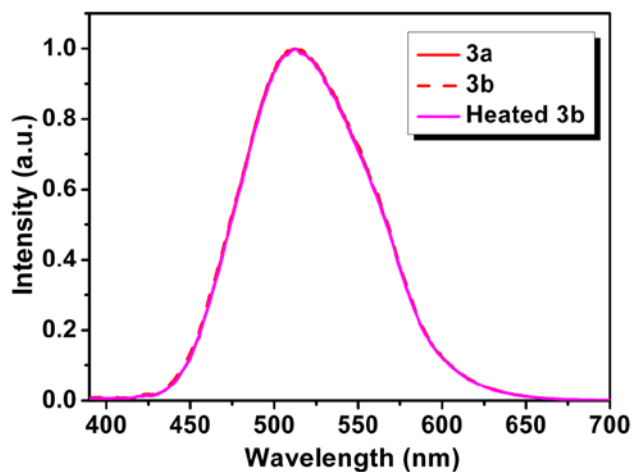

**Fig. S6** Emission spectra of **3** in different states at room temperature.

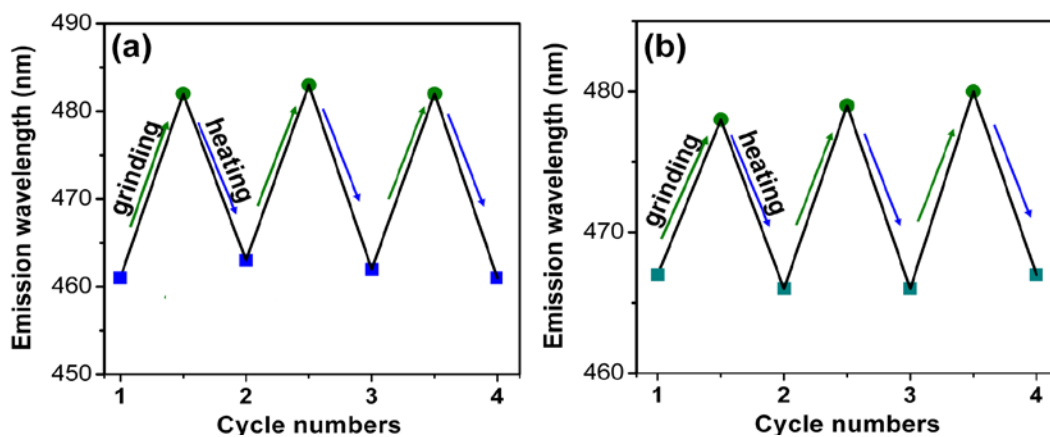

**Fig. S7** Reversible switching of emission of **1** (a) and **2** (b) by repeated grinding-heating cycle.

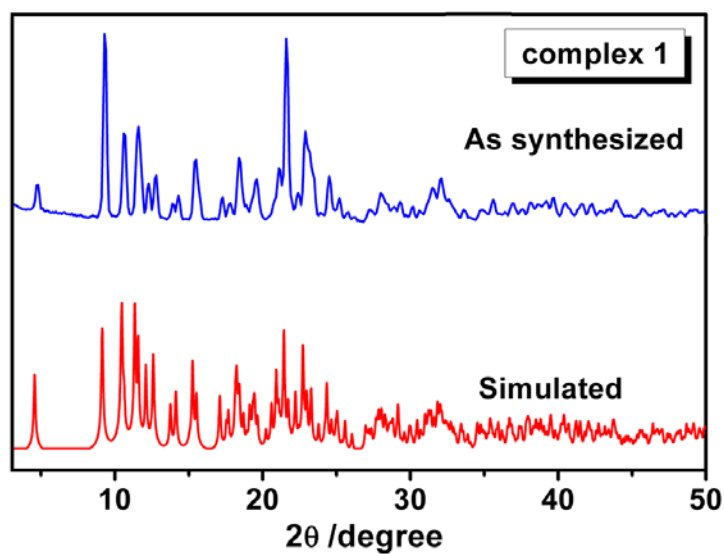

**Fig. S8** Experimental and simulated Powder X-ray diffraction patterns.

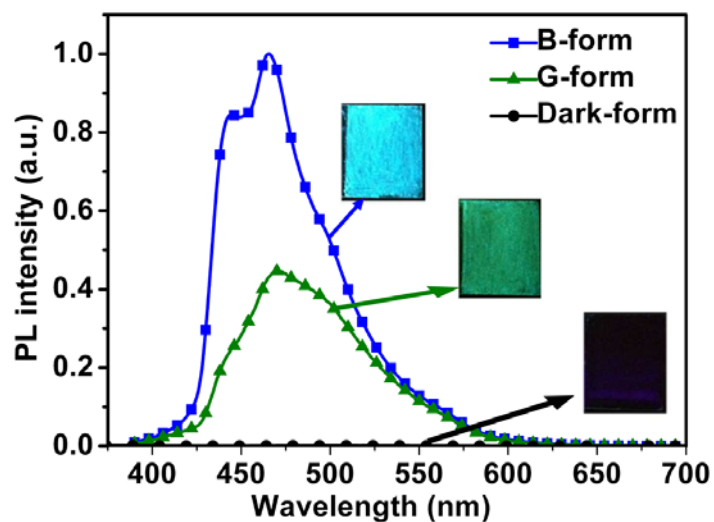

**Fig. S9** Emission spectra of B-form, G-form and dark-form at room temperature.

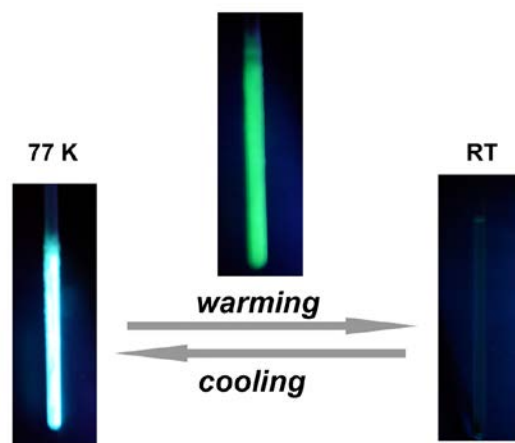

**Fig. S10** Luminescence images of  $\text{CH}_3\text{CN}$  solution of complex **2** in a quartz tube at different temperature. RT = room temperature

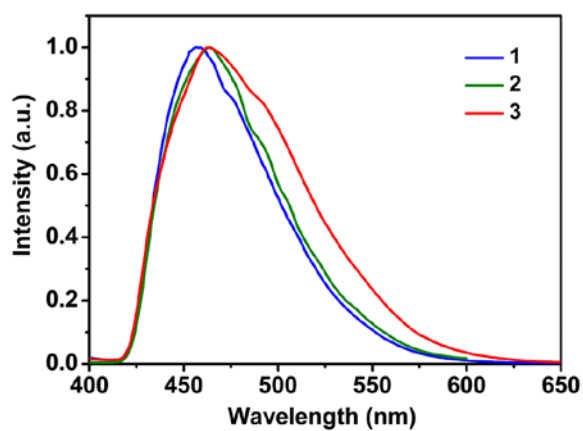

**Fig. S11** Emission spectra of complex **1**, **2** and **3** in  $\text{CH}_3\text{CN}$  solutions with concentration of  $1 \times 10^{-5}$  M at 77 K.

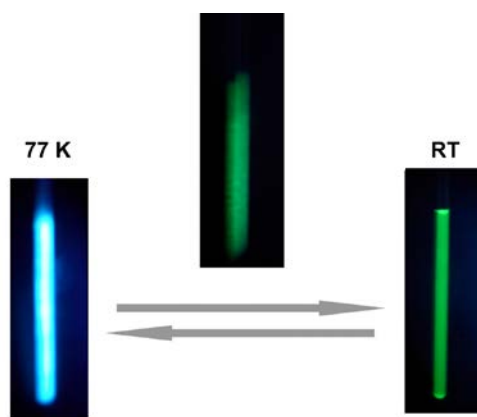

**Fig. S12** Photographic images of complex **1** in different temperature with concentration of  $1 \times 10^{-5}$  M.

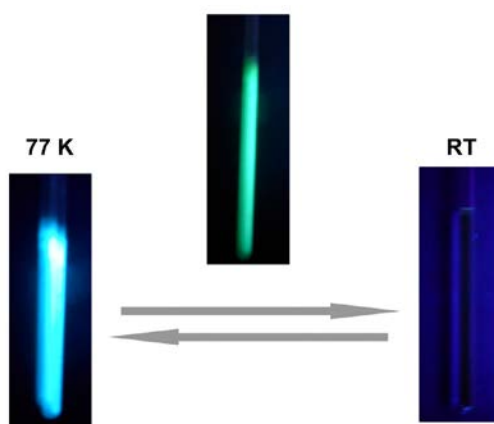

**Fig. S13** Photographic images of complex **3** in different temperature with concentration of  $1 \times 10^{-5}$  M.

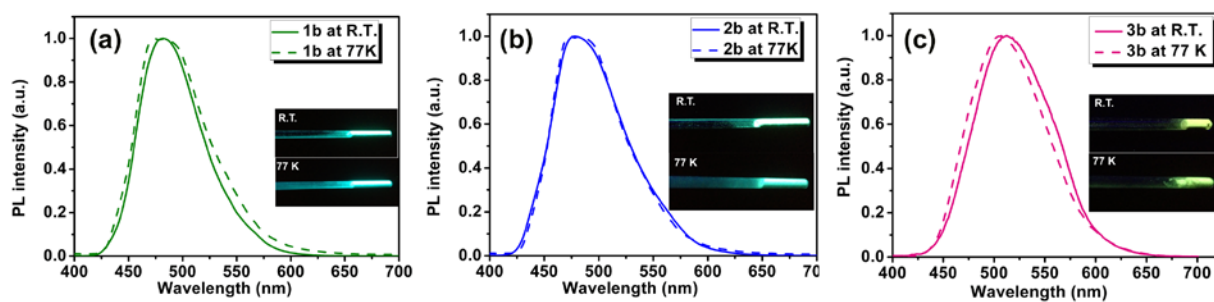

**Fig. S14** Emission spectra and photographic images of ground samples **1b**, **2b** and **3b** at room temperature and 77 K.



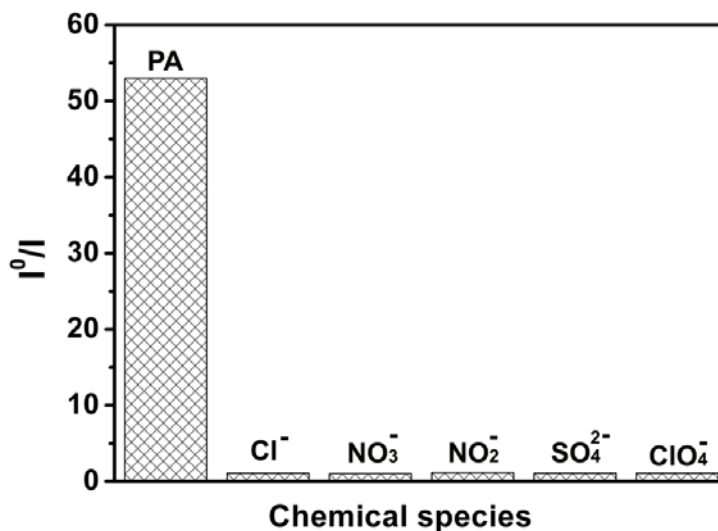

**Fig. S15** Luminescent responses of complex **2** in acetone/water (v:v=1:9) mixture to different chemical species with concentration of 10 ppm. Bars represent the ratio of  $I_0/I$  of luminescent intensity at 483 nm. Herein,  $I_0$ =PL intensity without chemical species.

## References

- [1] M. J. Frisch, G. W. Trucks, H. B. Schlegel, G. E. Scuseria, M. A. Robb, J. R. Cheeseman, G. Scalmani, V. Barone, B. Mennucci, G. A. Petersson, H. Nakatsuji, M. Caricato, X. Li, H. P. Hratchian, A. F. Izmaylov, J. Bloino, G. Zheng, J. L. Sonnenberg, M. Hada, M. Ehara, K. Toyota, R. Fukuda, J. Hasegawa, M. Ishida, T. Nakajima, Y. Honda, O. Kitao, H. Nakai, T. Vreven, J. A. Montgomery, Jr., J. E. Peralta, F. Ogliaro, M. Bearpark, J. J. Heyd, E. Brothers, K. N. Kudin, V. N. Staroverov, R. Kobayashi, J. Normand, K. Raghavachari, A. Rendell, J. C. Burant, S. S. Iyengar, J. Tomasi, M. Cossi, N. Rega, J. M. Millam, M. Klene, J. E. Knox, J. B. Cross, V. Bakken, C. Adamo, J. Jaramillo, R. Gomperts, R. E. Stratmann, O. Yazyev, A. J. Austin, R. Cammi, C. Pomelli, J. W. Ochterski, R. L. Martin, K. Morokuma, V. G. Zakrzewski, G. A. Voth, P. Salvador, J. J. Dannenberg, S. Dapprich, A. D. Daniels, O. Farkas, J. B. Foresman, J. V. Ortiz, J. Cioslowski and D. J. Fox, Gaussian 09W, Revision A.02; Gaussian, Inc., Wallingford CT, 2009.
